# Supplementary material for: A diminutive modification in arylamine electron donors: synthesis, photophysics and solvatochromic analysis – towards the understanding of dye sensitized solar cell performances
Source: Royal Society of Chemistry journal article supplement (doi:10.1039/c5cp05338b), 2015-01-01
Supplement: c5cp05338b1.pdf [file c5cp05338b1.pdf]

## Supporting Information

# **A diminutive modification in arylamine electron donors: synthesis, photophysics and solvatochromic analysis – towards the understanding of dye sensitized solar cell performances**

Venkatesan Srinivasan,<sup>1</sup> Murugesan Panneer,<sup>2</sup> Madhavan Jaccob,<sup>2</sup> Nagaraj Pavithra,<sup>3</sup> Sambandam Anandan,<sup>3</sup> Arunkumar Kathiravan<sup>1\*</sup>

<sup>1</sup> National Centre for Ultrafast Processes, University of Madras, Taramani Campus, Chennai – 600 113, Tamil Nadu, India

<sup>2</sup> Department of Chemistry, Loyola College, Chennai – 600 034, Tamil Nadu, India

<sup>3</sup> Nanomaterials and Solar Energy Conversion Laboratory, Department of Chemistry, National Institute of Technology, Tiruchirappalli - 620 015, Tamil Nadu, India

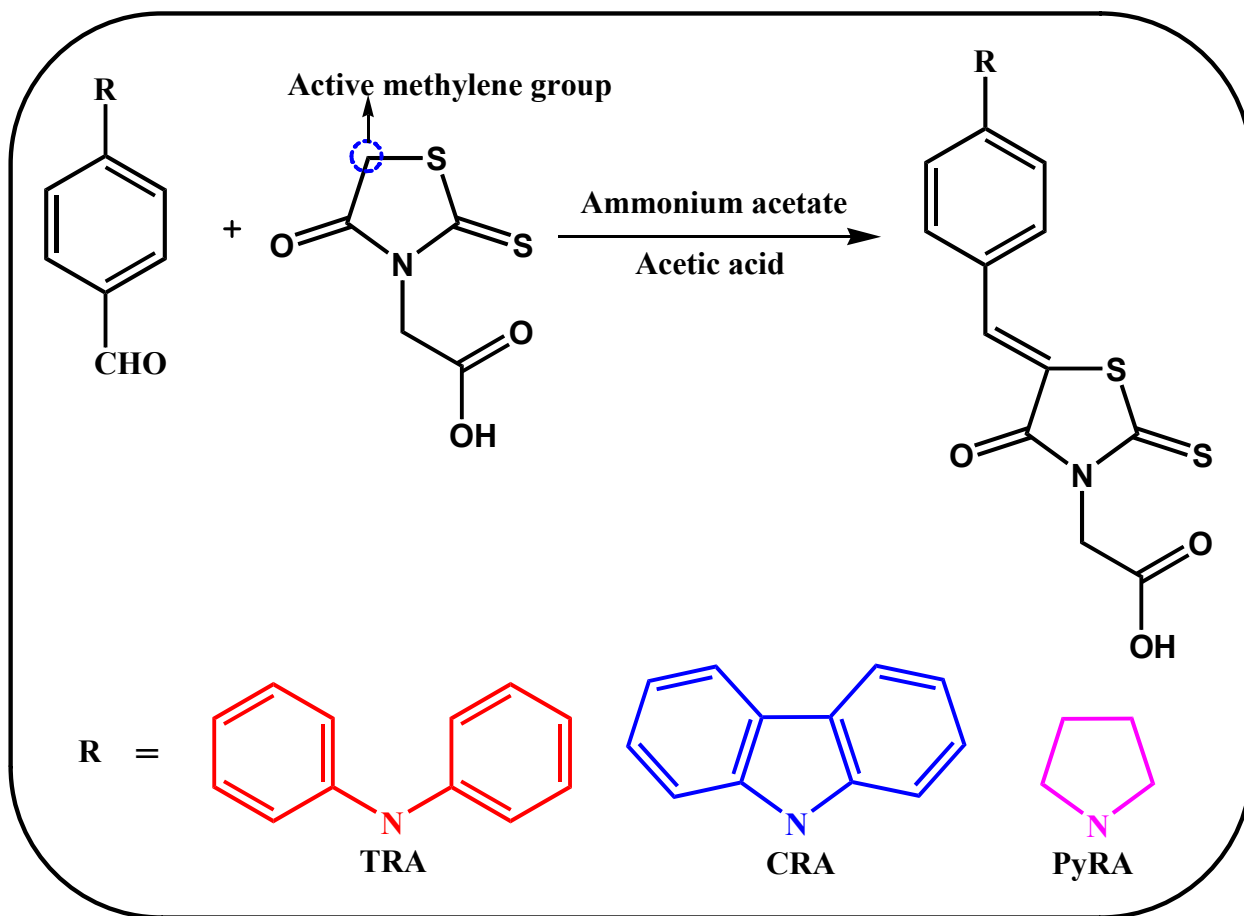

**Scheme S1:** Synthetic route of Arylamine dyes

**Synthesis of [5-(4-Diphenylamino-benzaldene)-4-oxo-2-thioxo-thiazolidin-3-yl]-acetic acid (TRA):**

A mixture of 4-(Diphenylamino) benzaldehyde (0.39 g, 1.46 mmol), 4-oxo-2-thioxo-3-thiazolidinyl acetic acid (0.41 g, 2.19 mmol), acetic acid (5 mL) and ammonium acetate (4 mg) was stirred at reflux 12 h. The resultant mixture was poured into ice-cold water to give a Orange colour precipitate. This was filtered, washed thoroughly with water and then dried. The crude product was purified by silica gel column chromatography using chloroform-methanol (v/v: 10: 0.5) to obtain a red solid. Yield: 53.1%. MP: > 200°C. **IR (cm<sup>-1</sup>)** : 1723 (-C=O-), 1702 (-C=O-), 1571 (-C=C-). **<sup>1</sup>H NMR:** (DMSO-d<sub>6</sub>, 400 MHz) δ ppm: 7.74 (s, 1H), 7.51-7.53 (d, J = 8 Hz, 2H, Aromatic), 7.38-7.42 (t, J = 16 Hz, 4H, aromatic), 7.18-7.23 (m, 6H, Aromatic), 6.89-6.91 (d, J=8Hz, 2H), 4.70 (s, 2H, CH<sub>2</sub>COOH). **<sup>13</sup>C NMR:** (DMSO-d<sub>6</sub>, 100 MHz) δ ppm: 193.35, 167.84, 166.93, 150.66, 145.98, 134.47, 133.34, 130.49, 126.68, 125.85, 124.96, 119.76, 117.66, 45.48. MS-EI: (m/z) calcd for C<sub>24</sub>H<sub>18</sub>N<sub>2</sub>O<sub>3</sub>S<sub>2</sub> : 446.08, Found: 446.09.

**Synthesis of [5-(4-Carbazol-9-yl-benzylidene)-4-oxo-2-thioxo-thiazolidin-3-yl]-acetic acid (CRA):**

A mixture of N-(4-Formyl phenyl) carbazole (0.40 g, 1.47 mmol), 4-oxo-2-thioxo-3-thiazolidinyl acetic acid (0.42 g, 2.20 mmol), acetic acid (5 mL) and ammonium acetate (4 mg) was stirred at reflux 12 h. The resultant mixture was poured into ice-cold water to give a yellow colour precipitate. This was filtered, washed thoroughly with water and then dried. The crude product was purified by silica gel column chromatography using chloroform-methanol (v/v: 10 : 0.5) to obtain a red solid. **Yield:** 74.99%. **Melting point :** > 200°C. **IR (cm<sup>-1</sup>):** 1746 (-C=O-), 1703 (-C=O-), 1583 (-C=C-). **<sup>1</sup>H NMR :** (DMSO-d<sub>6</sub>, 400 MHz) δ ppm: 13.50 (br s, 1H, COOH), 8.26-8.28 (d,2H,J=8Hz,Aromatic), 7.97-8.00 (d, J = 12 Hz, 2H, aromatic), 7.87-7.89 (d, J = 8 Hz, 2H, aromatic), 7.53-7.55 (d, J = 8Hz, 2H, aromatic), 7.45-7.49 (m, 2H),7.32-7.35 (m,2H,Aromatic), 4.79 (s,2H,CH<sub>2</sub>COOH). **<sup>13</sup>C NMR:(DMSOd<sub>6</sub>, 100MHz) δppm:**193.54, 167.78, 166.89, 139.97, 139.6, 133.49, 133.13, 131.92, 127.54, 126.98, 123.65, 122.57, 121.18, 121.13, 110.37, 45.57. MS-EI :(m/z) calcd for C<sub>24</sub>H<sub>16</sub>N<sub>2</sub>O<sub>3</sub>S<sub>2</sub>: 444.06, Found: 444.11.

**Synthesis of [4-Oxo-5-(4-pyrrolidin-1-yl-benzylidene)-2-thioxo-thiazolidin-3-yl]-acetic acid (PyRA):**

A mixture of 4-(1-Pyrrolidino) benzaldehyde (0.40 g, 2.29 mmol), 4-oxo-2-thioxo-3-thiazolidinyl acetic acid (0.65 g, 3.44 mmol), acetic acid (5 mL) and ammonium acetate (4 mg) was stirred at reflux 12 h. The resultant mixture was poured into ice-cold water to give a Dark Red colour precipitate. This was filtered, washed thoroughly with water and then dried. The crude product was purified by silica gel column chromatography using chloroform-methanol (v/v: 10: 0.5) to obtain a red solid. **Yield:** 72.1%. **Melting point:** > 200°C. **IR (cm<sup>-1</sup>) :** 1699 (-C=O-), 1612 (-C=O-), 1561 (-C=C-). **<sup>1</sup>H NMR** (DMSO-d<sub>6</sub>, 400 MHz) δ ppm: 7.72 (s, 1H), 7.47-7.50 (d, J = 12 Hz, 2H, aromatic), 6.68-6.70 (d, J = 8 Hz, 2H, aromatic), 4.70 (s, 2H, CH<sub>2</sub>COOH), 1.96-1.99 (m, 6H) **<sup>13</sup>C NMR:** (DMSO-d<sub>6</sub>, 100MHz) δ ppm: 192.94, 167.94, 166.87, 150.08, 136.03, 134.06, 119.87, 113.04, 113.01, 47.89, 45.50, 25.37. MS-EI:(m/z) calcd for C<sub>16</sub>H<sub>16</sub>N<sub>2</sub>O<sub>3</sub>S<sub>2</sub>: 348.06, Found: 348.08.

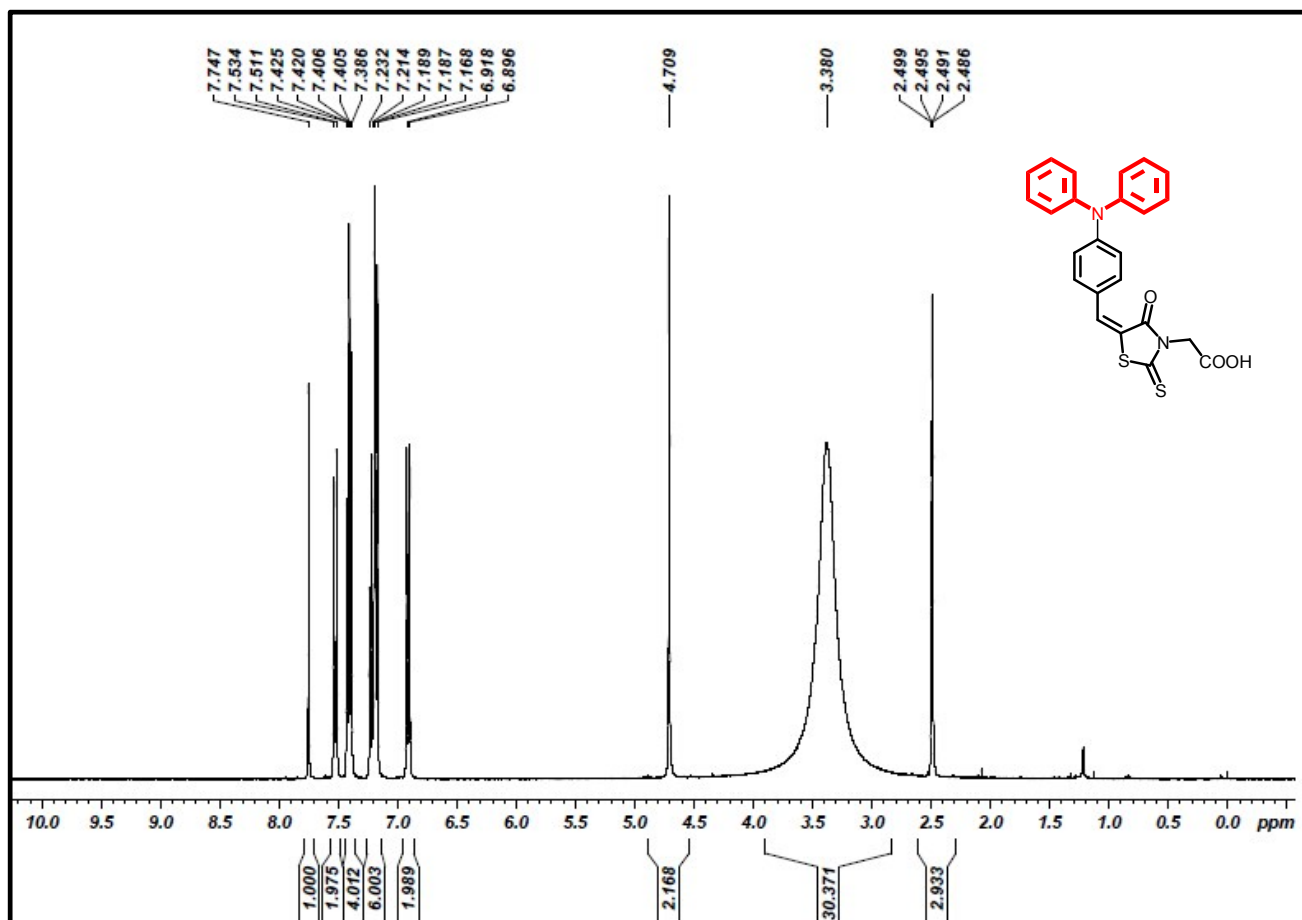

Figure S1:  $^1\text{H}$  NMR spectrum of TRA in  $\text{DMSO}-d_6$

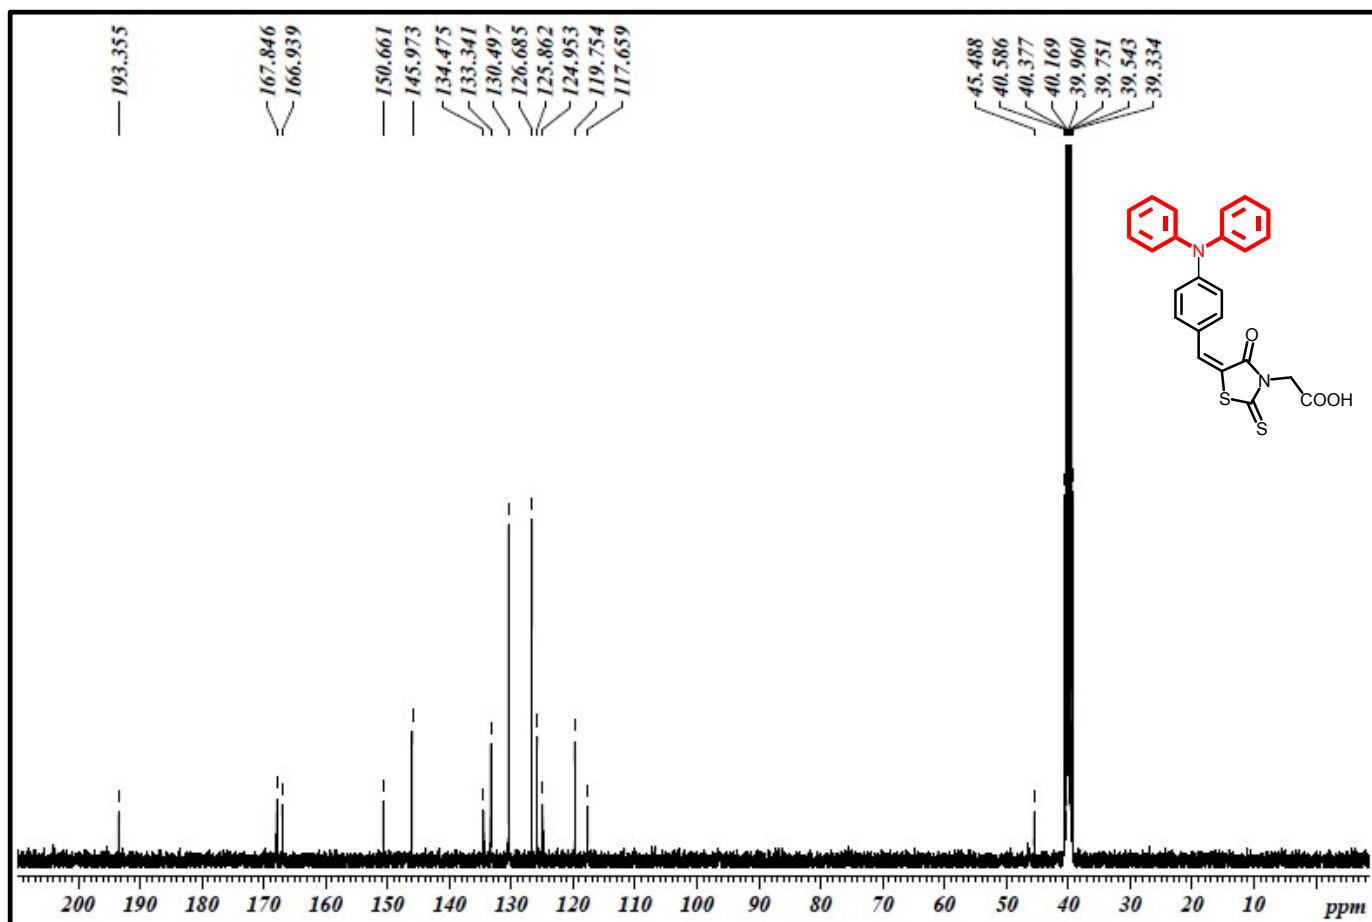

**Figure S2:**  $^{13}\text{C}$  NMR spectrum of TRA in  $\text{DMSO}-d_6$

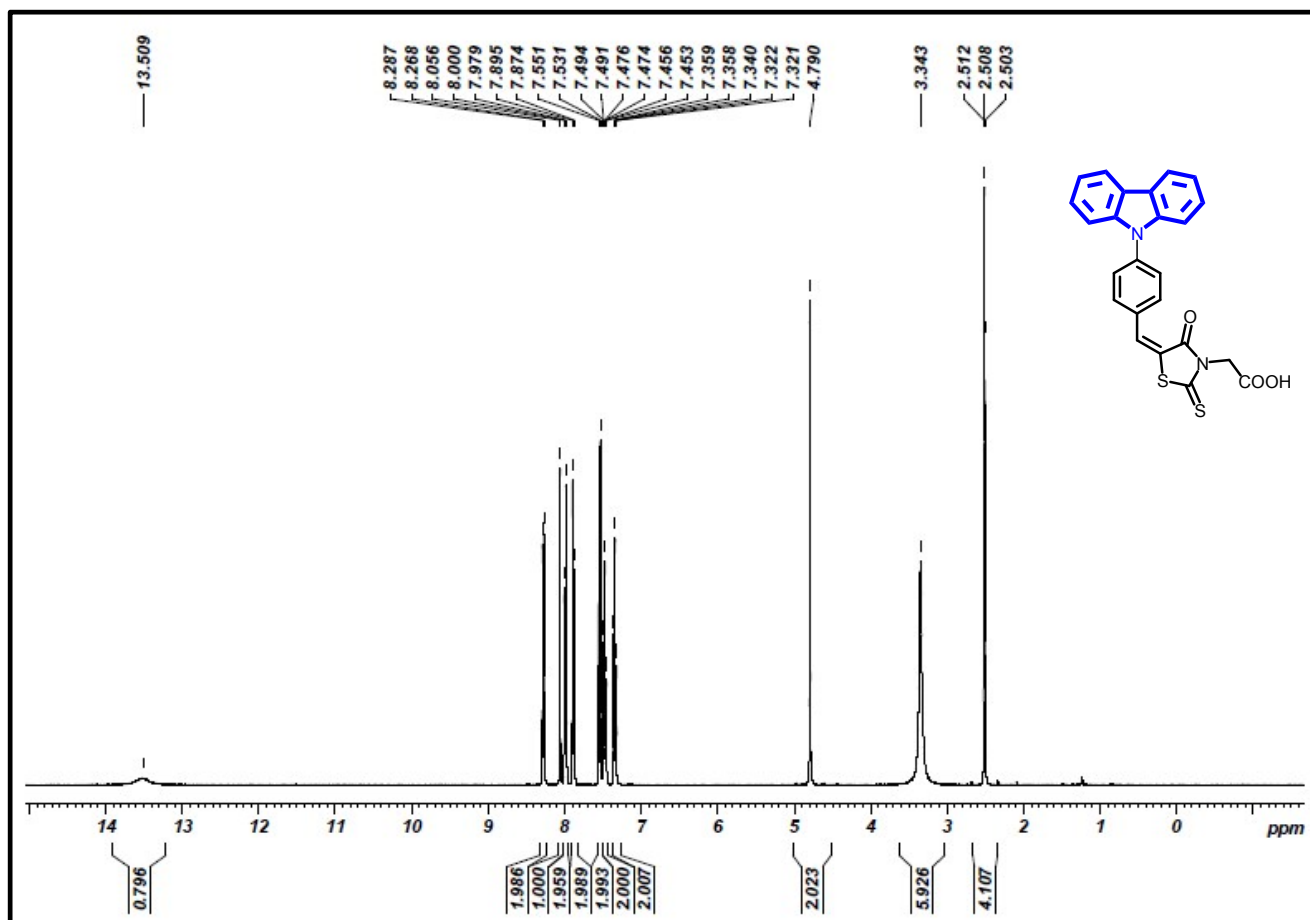

**Figure S3:** <sup>1</sup>H NMR spectrum of CRA in DMSO – d<sub>6</sub>

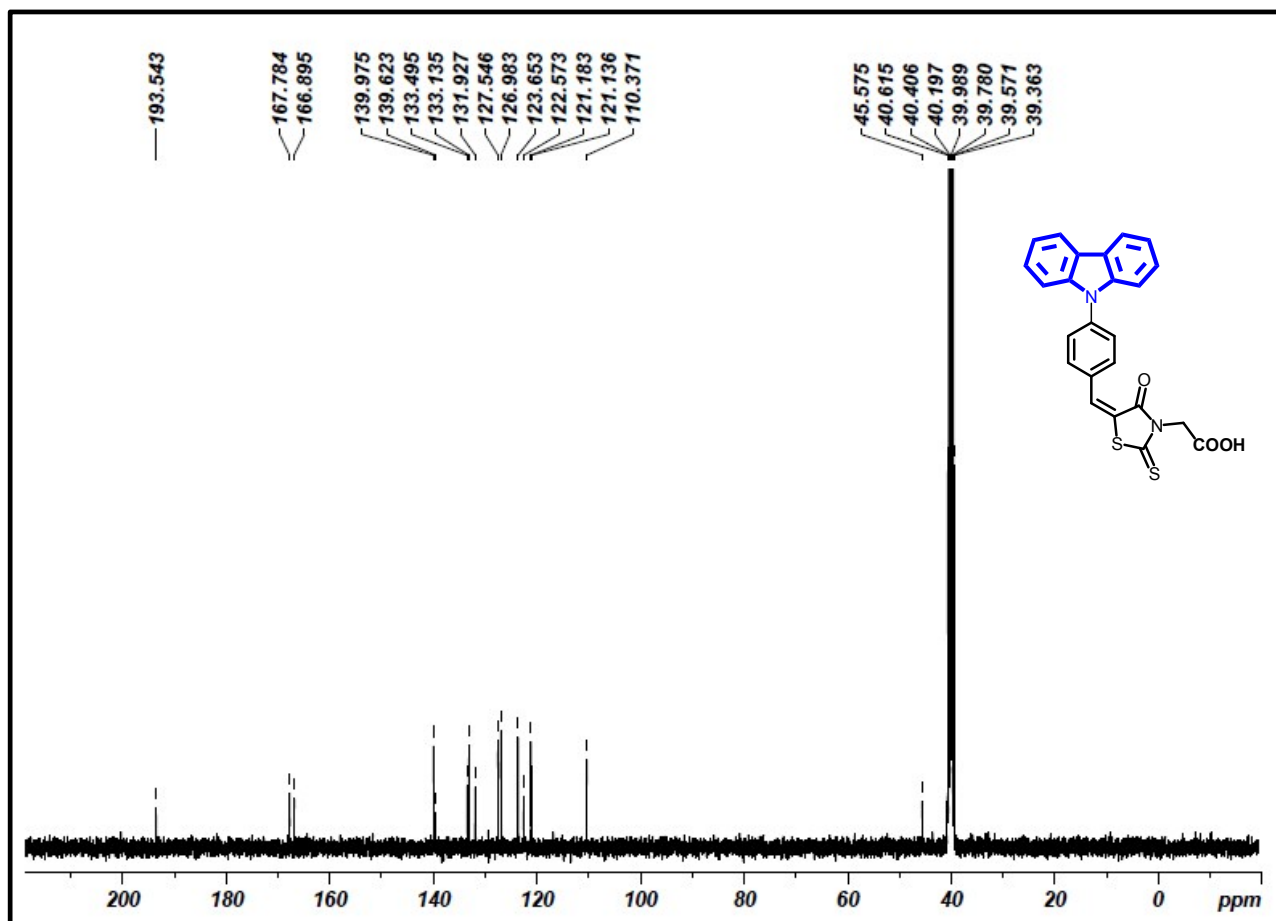

Figure S4:  $^{13}\text{C}$  NMR spectrum of CRA in  $\text{DMSO}-d_6$



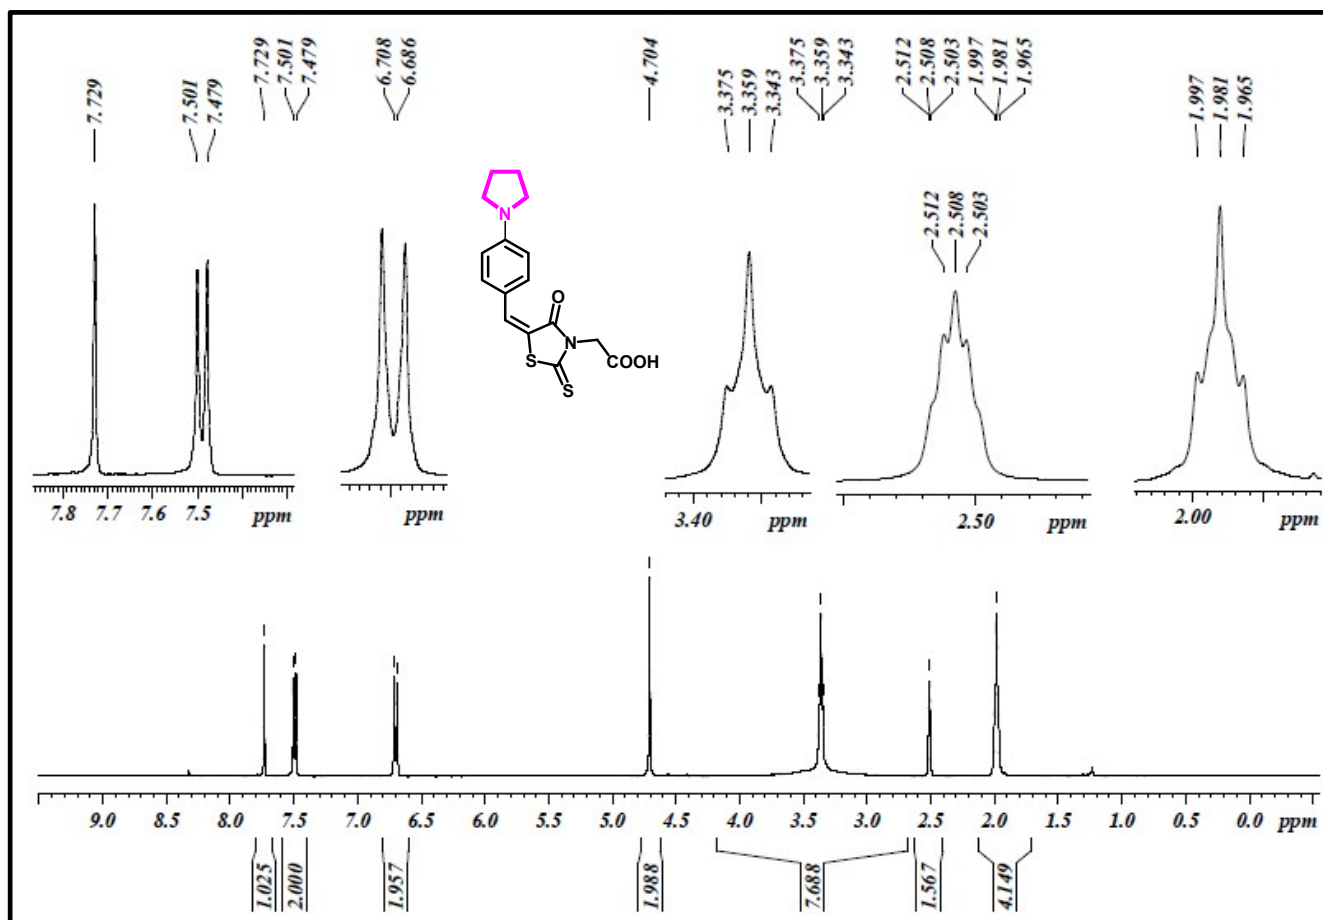

Figure S5: <sup>1</sup>H NMR spectrum of PyRA in DMSO - d<sub>6</sub>

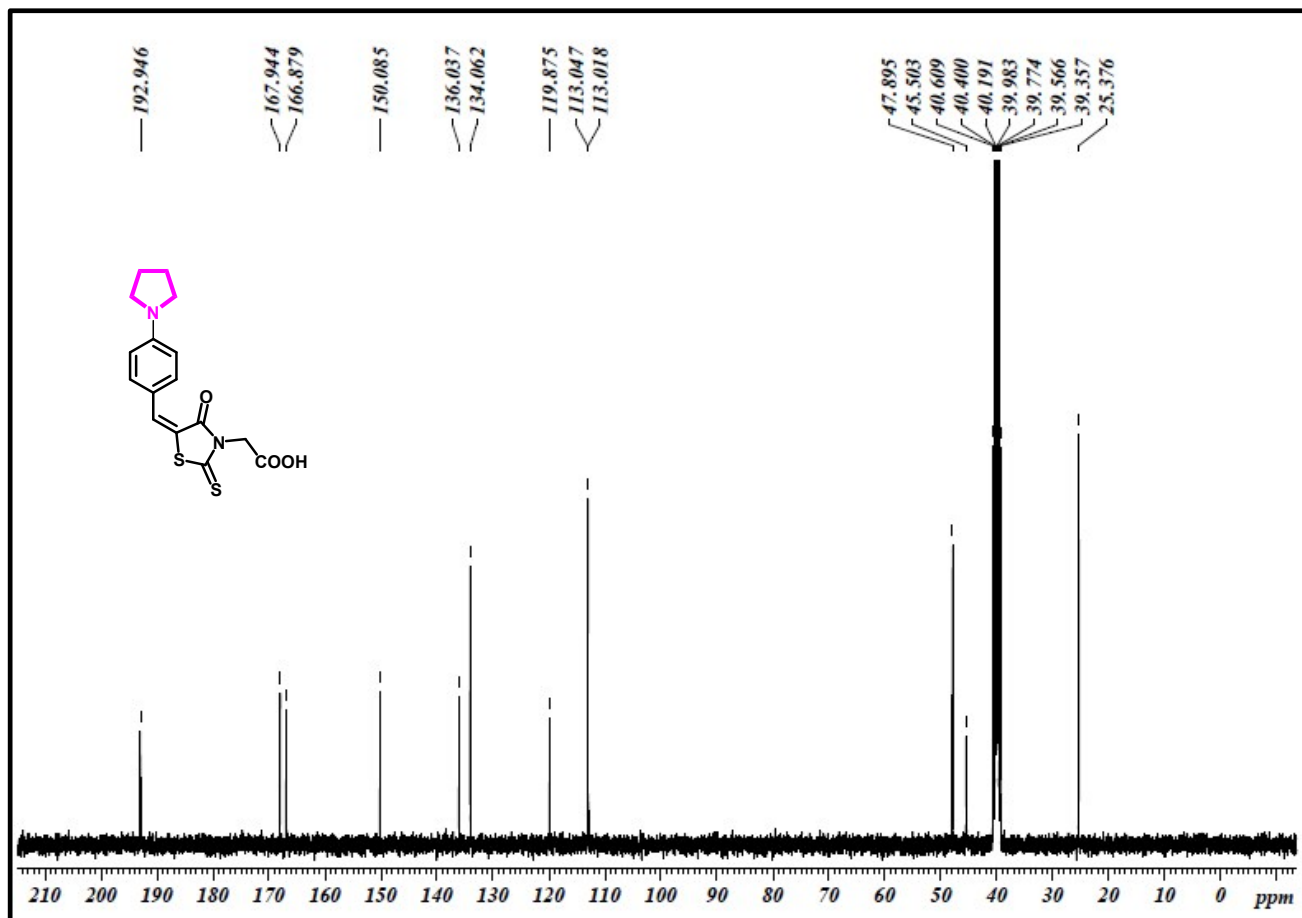

Figure S6:  $^{13}\text{C}$  NMR spectrum of PyRA in  $\text{DMSO}-d_6$

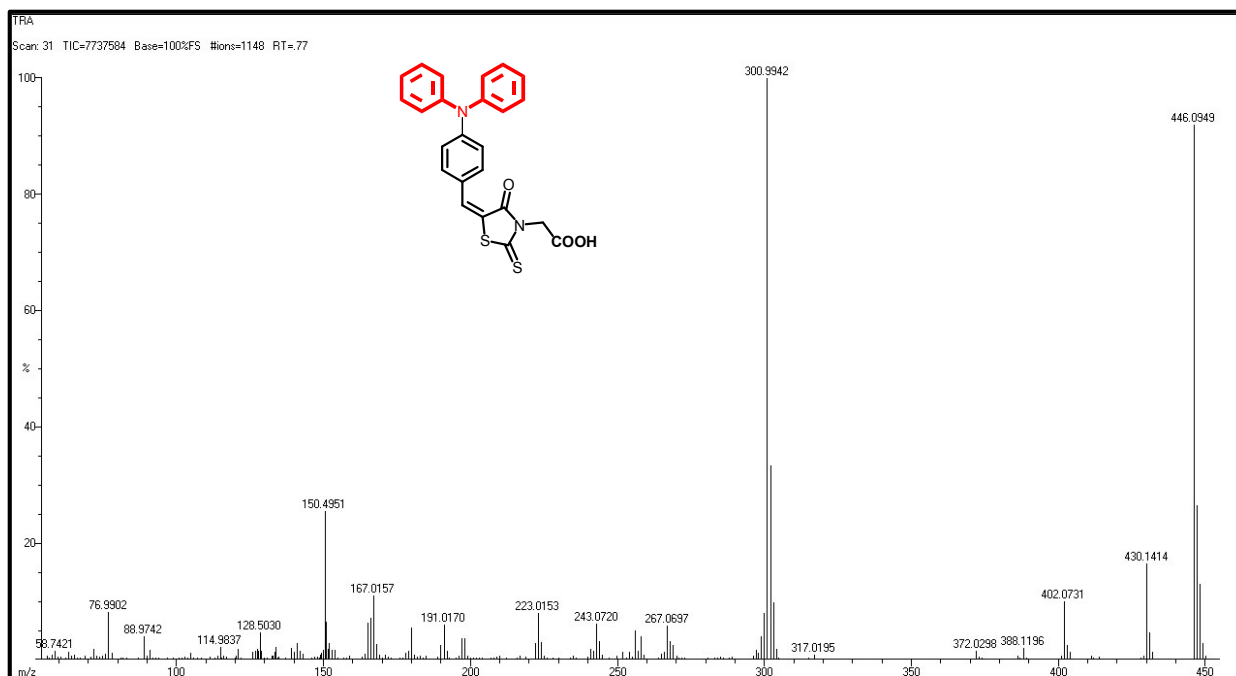

**Figure S7:** Mass spectrum of TRA

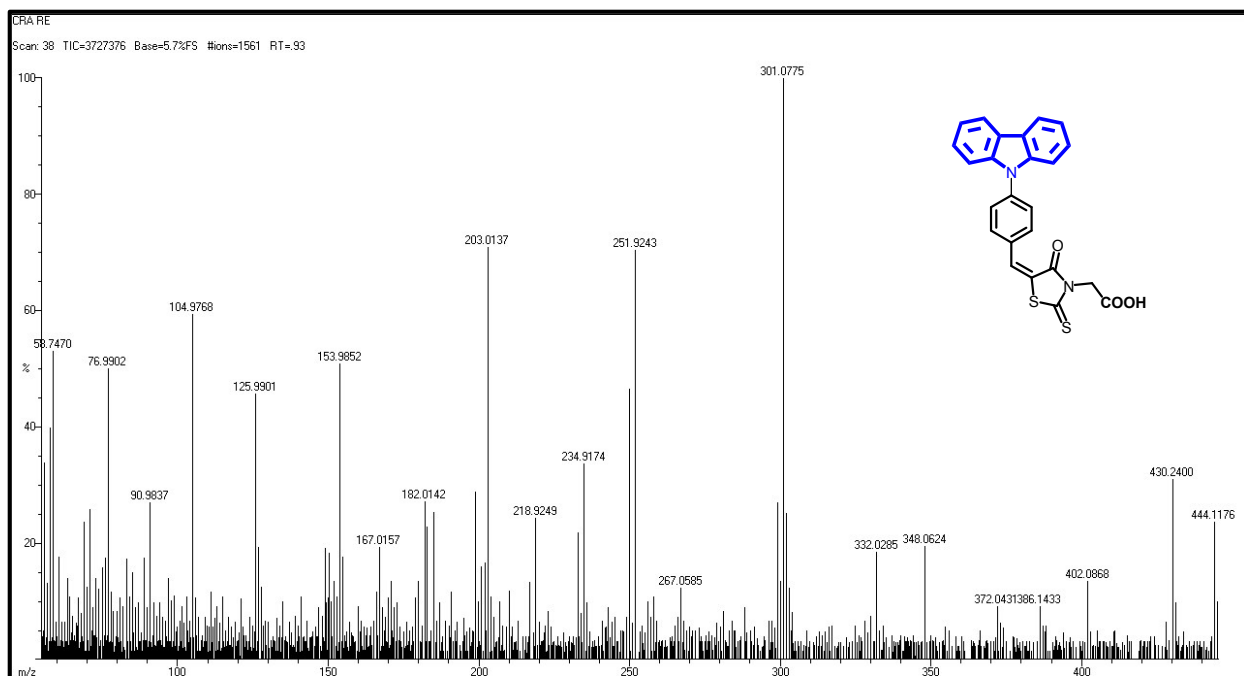

**Figure S8:** Mass spectrum of CRA

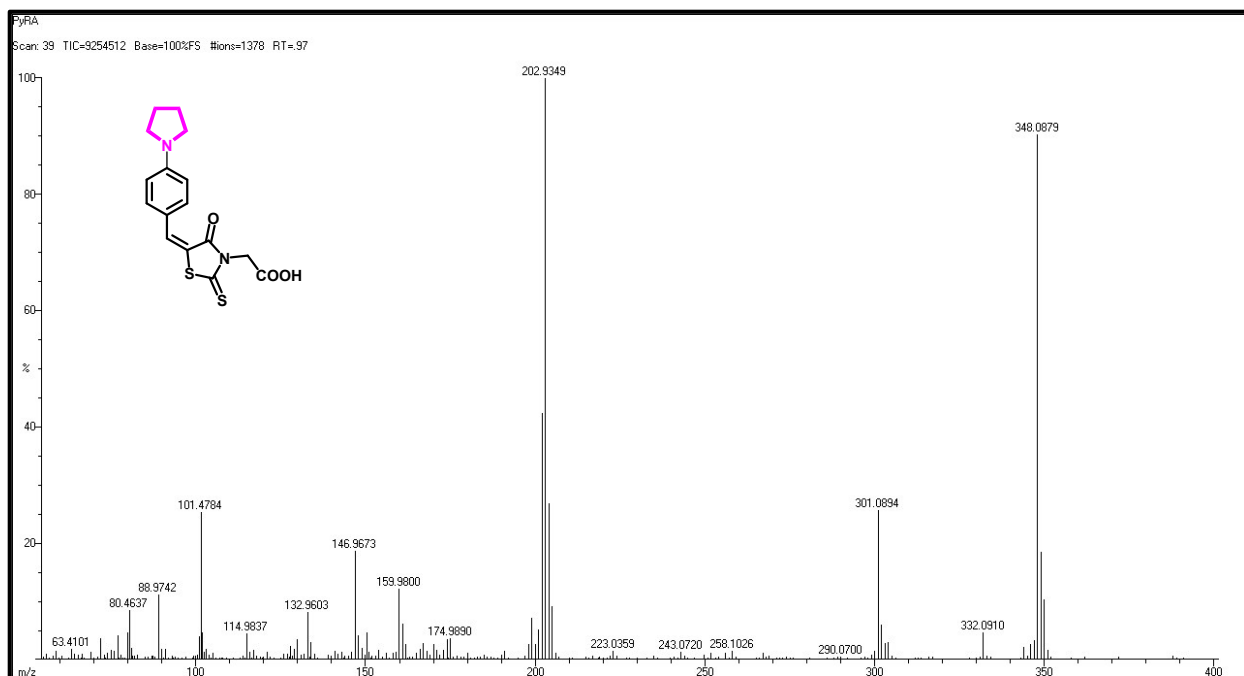

**Figure S9:** Mass spectrum of PyRA

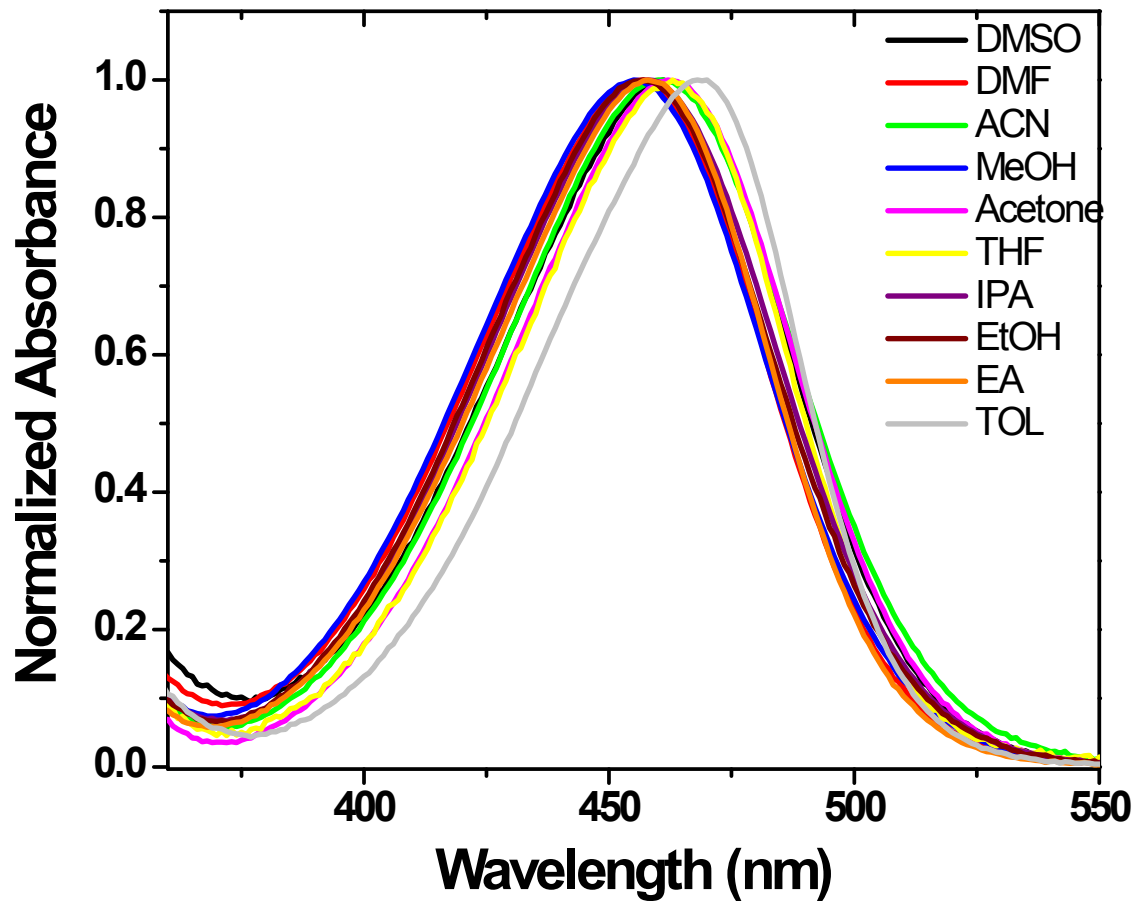

Figure S10: Normalized absorption spectra of TRA in various solvents

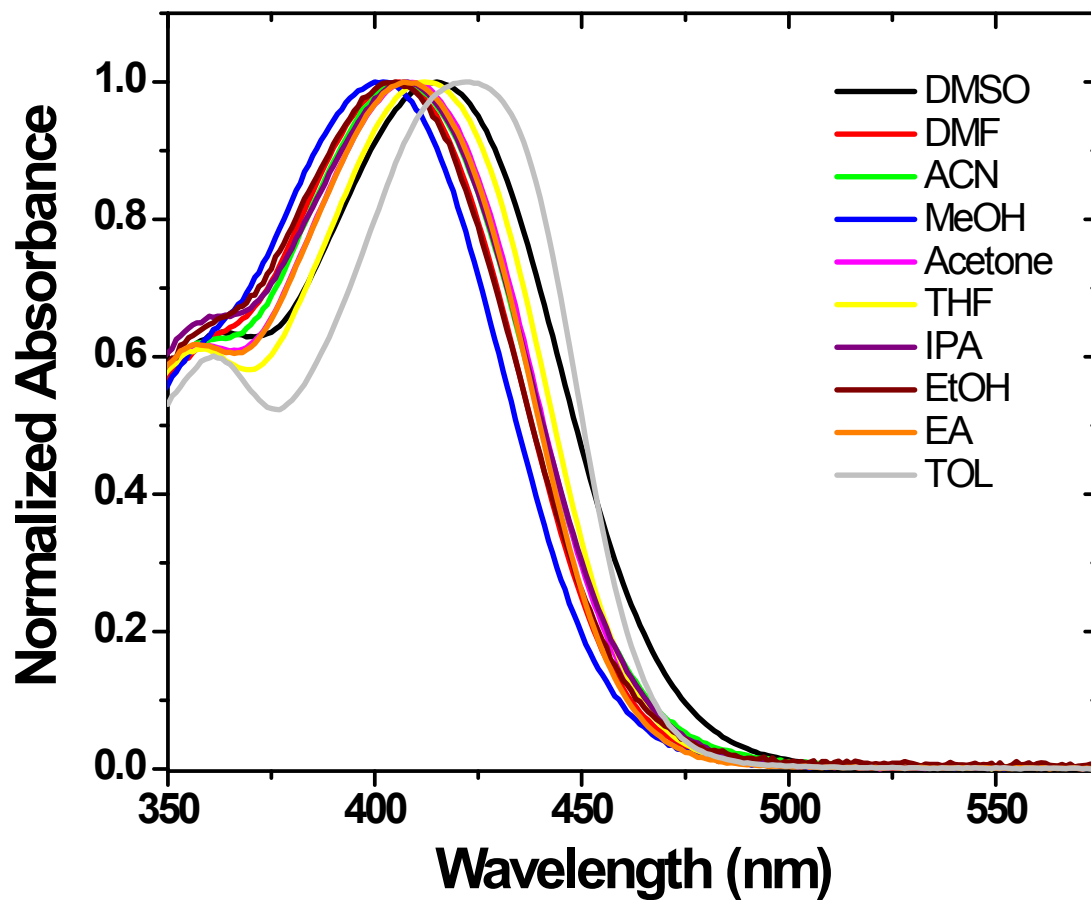

Figure S11: Normalized absorption spectra of CRA in various solvents

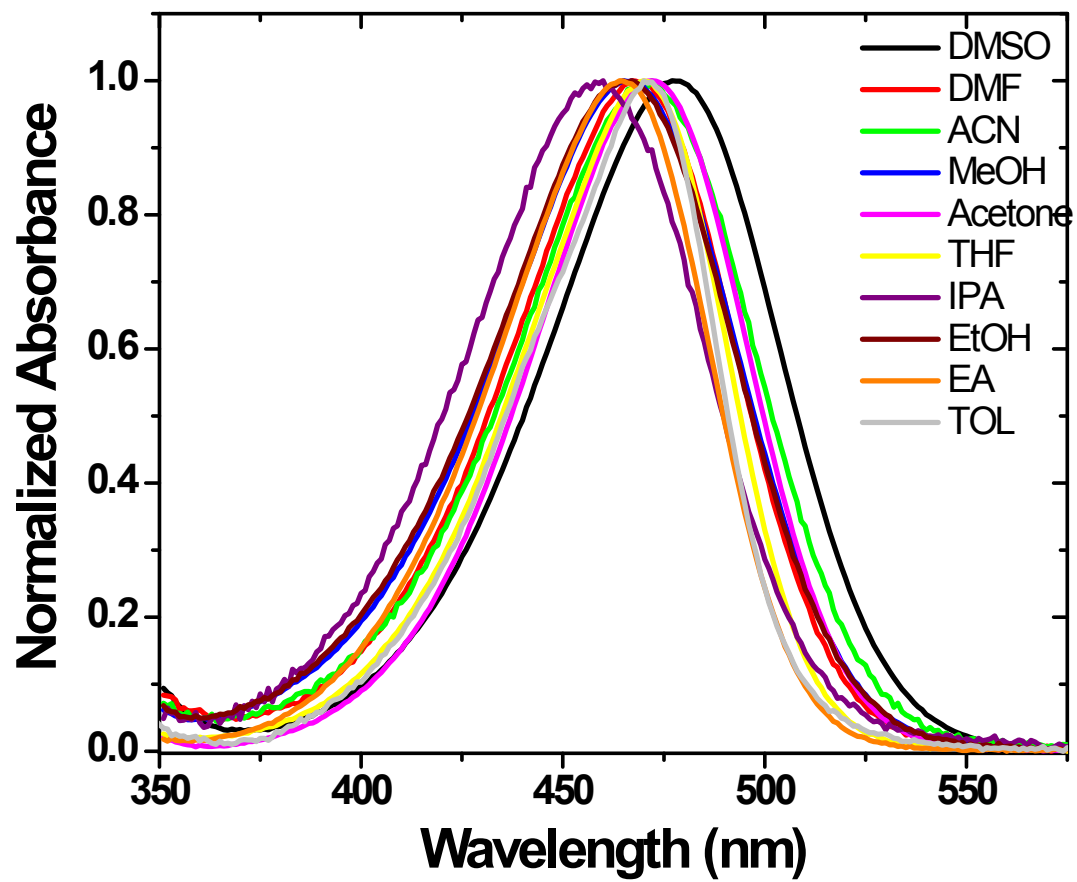

Figure S12: Normalized absorption spectra of PyRA in various solvents



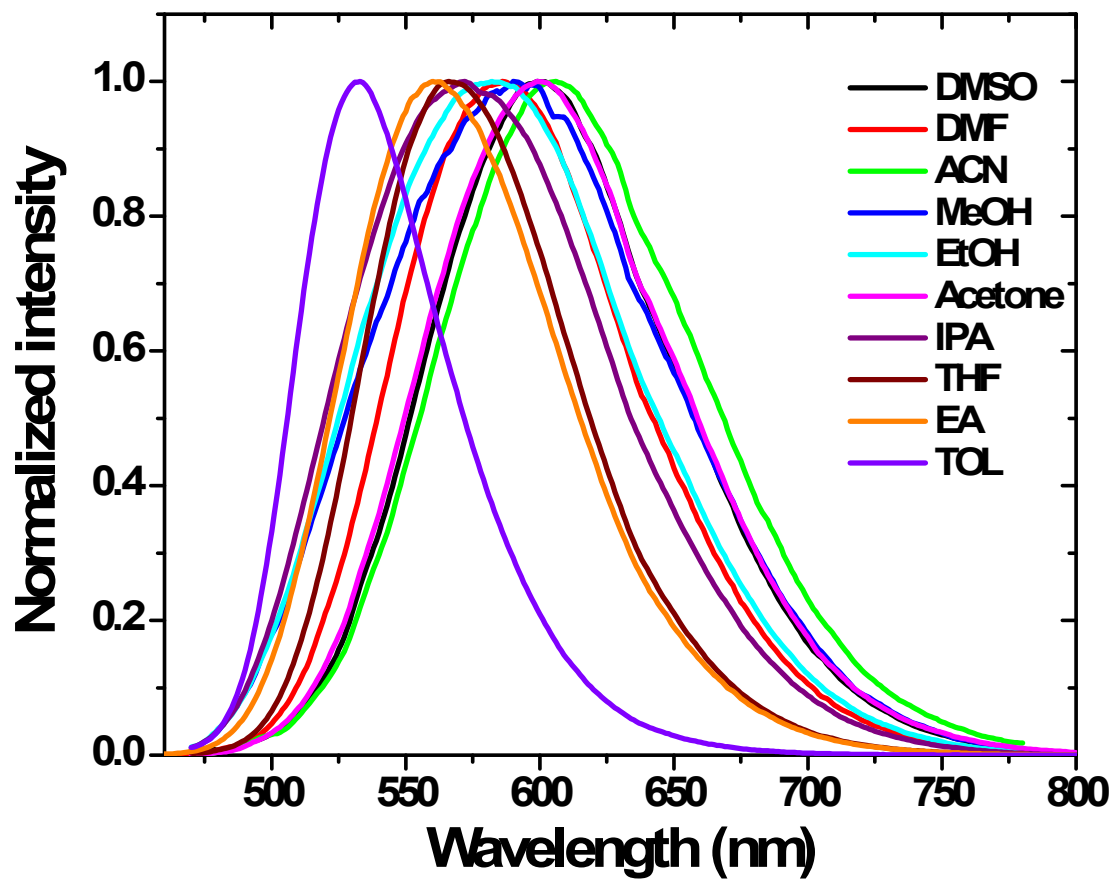

Figure S13: Normalized fluorescence spectra of TRA in various solvents

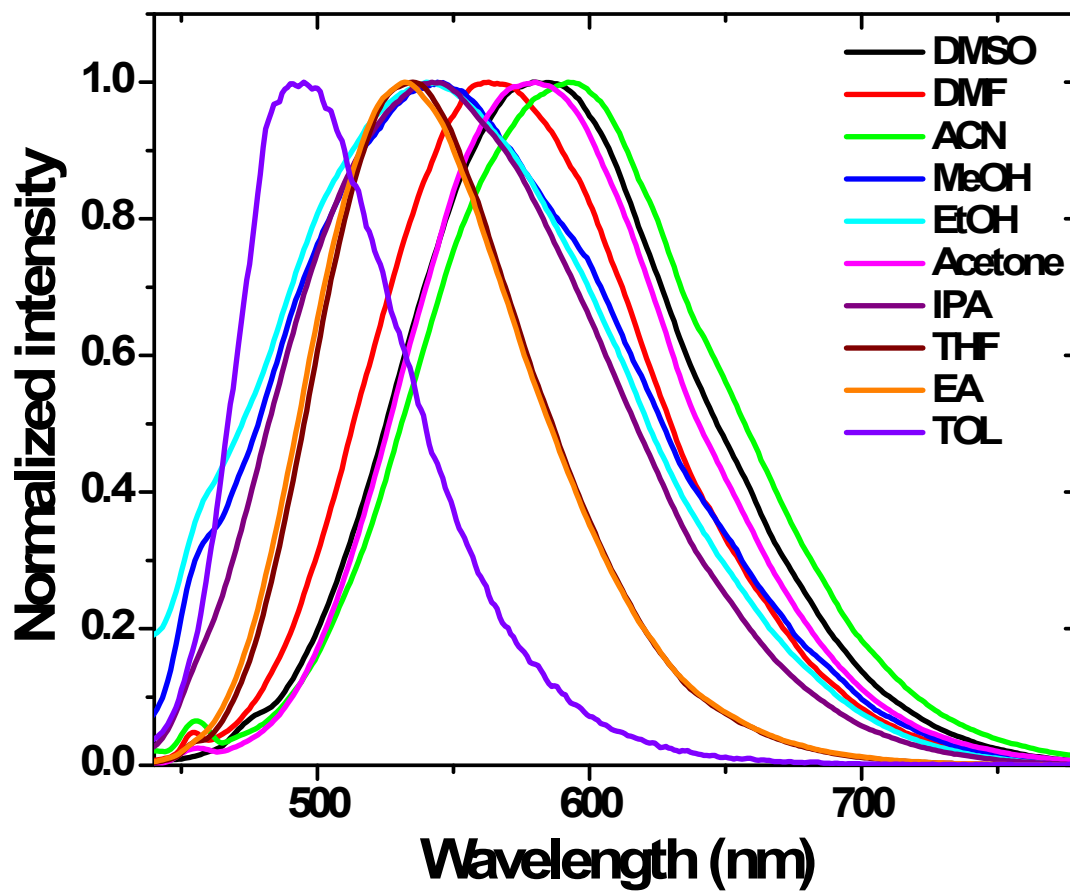

Figure S14: Normalized fluorescence spectra of CRA in various solvents

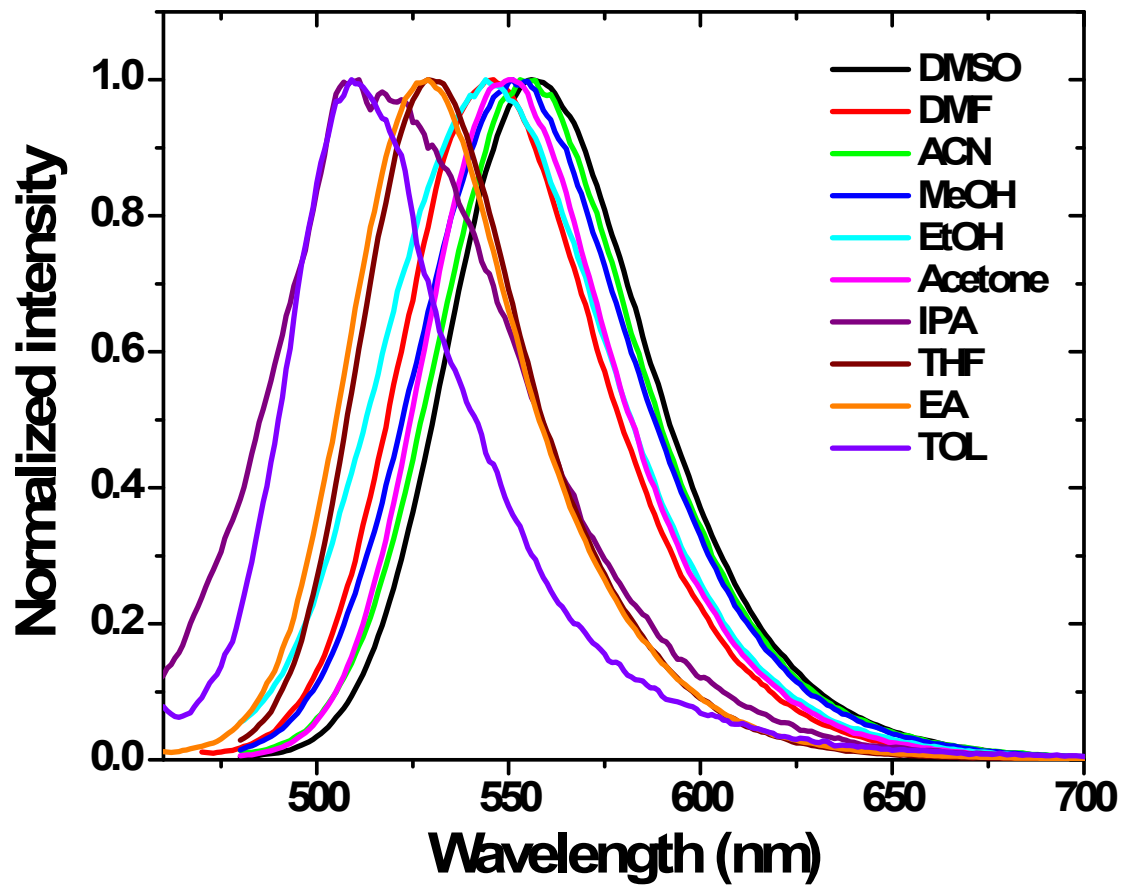

Figure S15: Normalized fluorescence spectra of PyRA in various solvents

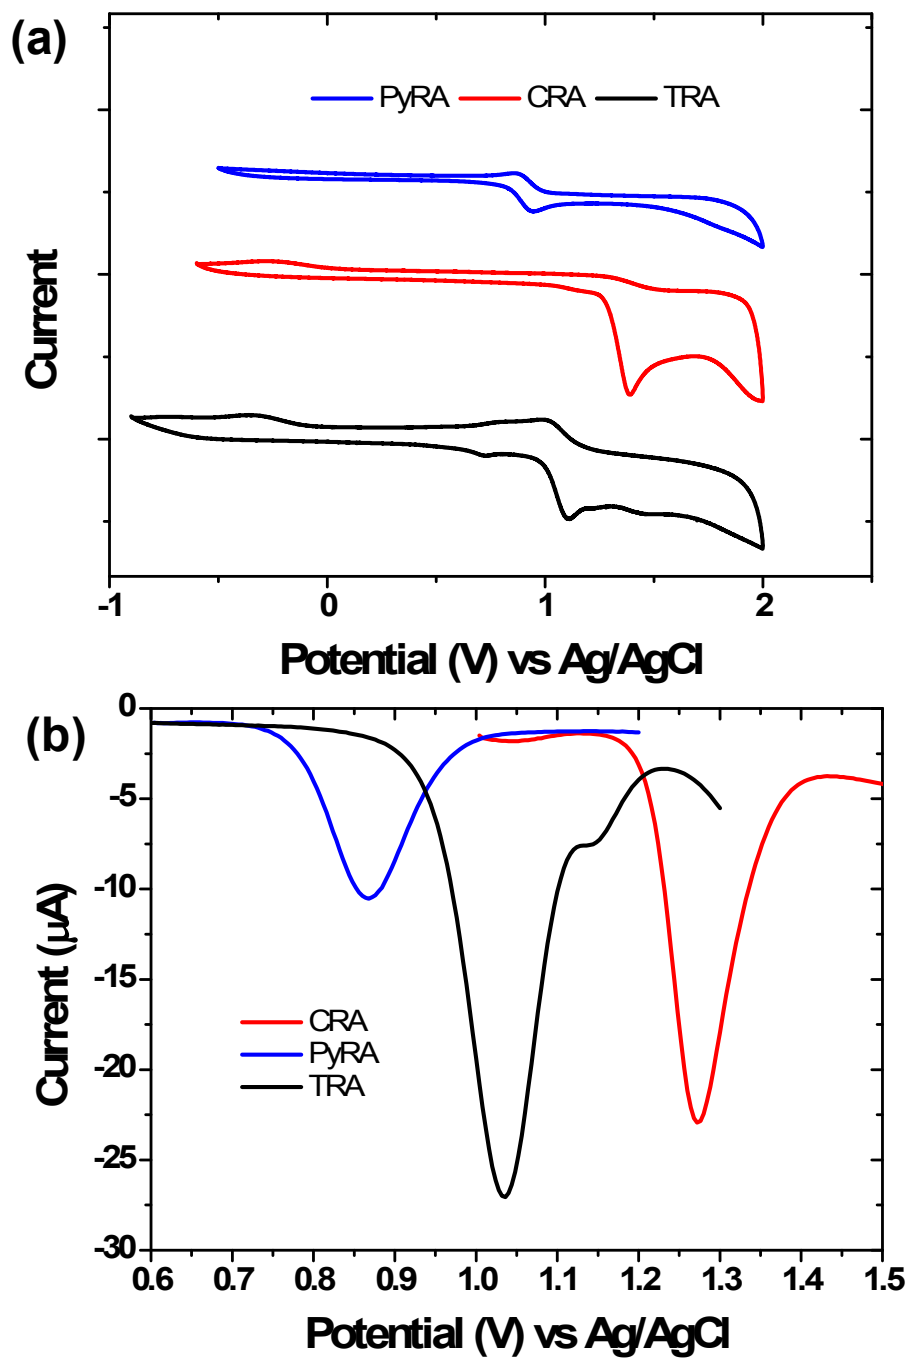

Figure S16: CV and DPV plots of arylamine dyes

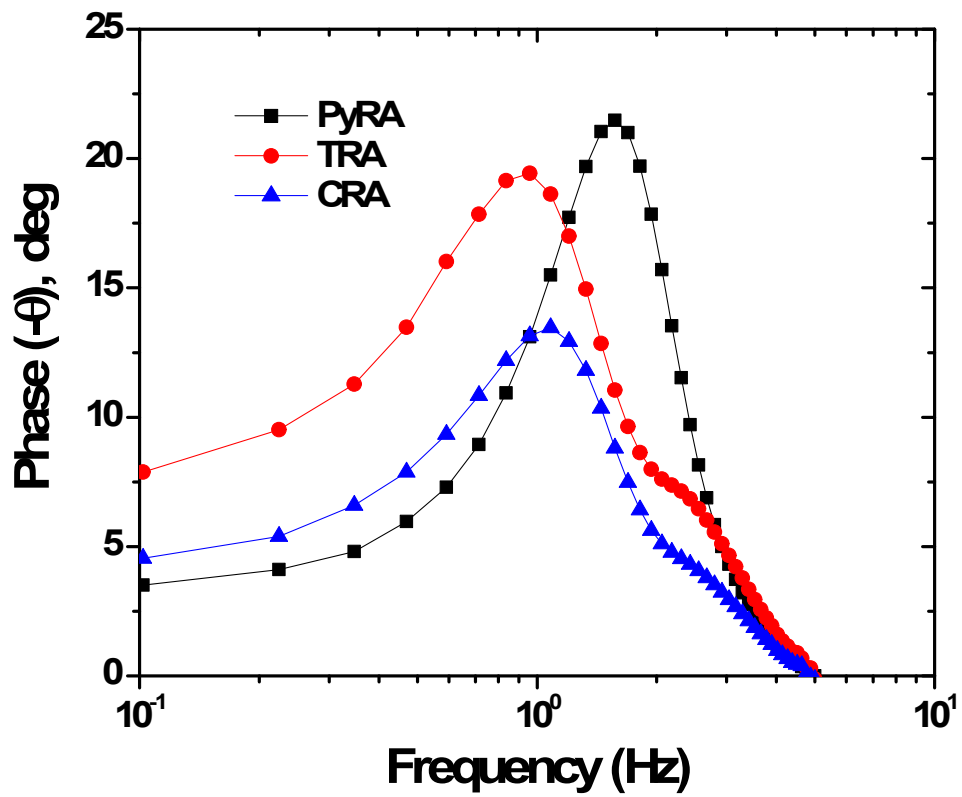

Figure S17: Bode phase plots of TRA, CRA and PyRA devices.

**Table S1:** Absorption maxima, emission maxima and Stokes' shift of dyes in various solvents

| Solvents | Abs (nm) |     |      | Emi (nm) |     |      | $\Delta\nu$ (cm <sup>-1</sup> ) |      |      | $\Delta f$ |
|----------|----------|-----|------|----------|-----|------|---------------------------------|------|------|------------|
|          | TRA      | CRA | PyRA | TRA      | CRA | PyRA | TRA                             | CRA  | PyRA |            |
| DMSO     | 461      | 415 | 477  | 600      | 581 | 557  | 4950                            | 6972 | 2967 | 0.2634     |
| ACN      | 462      | 407 | 472  | 603      | 591 | 555  | 5210                            | 7652 | 3213 | 0.3055     |
| DMF      | 456      | 405 | 469  | 587      | 561 | 544  | 4865                            | 7054 | 3006 | 0.2744     |
| MeOH     | 456      | 402 | 466  | 587      | 543 | 550  | 4971                            | 6487 | 3343 | 0.3086     |
| EtOH     | 456      | 405 | 465  | 582      | 533 | 542  | 4670                            | 5964 | 3009 | 0.2887     |
| Acetone  | 463      | 409 | 472  | 600      | 578 | 550  | 4922                            | 7266 | 3004 | 0.2843     |
| IPA      | 458      | 407 | 460  | 571      | 543 | 516  | 4338                            | 5913 | 2555 | 0.2721     |
| THF      | 463      | 411 | 470  | 567      | 533 | 528  | 4054                            | 5580 | 2408 | 0.2096     |
| EA       | 458      | 408 | 465  | 560      | 531 | 529  | 4103                            | 5748 | 2637 | 0.2010     |
| Toluene  | 471      | 421 | 469  | 532      | 495 | 509  | 2434                            | 3550 | 1675 | 0.0133     |
| Dioxane  | 463      | 414 | 468  | 543      | 507 | 516  | 3296                            | 4585 | 2545 | 0.0246     |
| DCM      | 474      | 422 | 483  | 603      | 565 | 545  | 4513                            | 5997 | 2355 | 0.2170     |
